# Supplementary material for: Diffusive ferromagnetic roller gas
Source: Royal Society of Chemistry journal article supplement (doi:10.1039/c9sm00274j), 2019-01-01
Supplement: c9sm00274j2.pdf [file c9sm00274j2.pdf]

## Supplementary Material for "Diffusive ferromagnetic roller gas"

Gašper Kokot,<sup>1</sup> Andrej Vilfan,<sup>1,2</sup> Andreas Glatz,<sup>1,2</sup> and Alexey Snezhko<sup>1</sup>

<sup>1</sup>Materials Science Division, Argonne National Laboratory, 9700 South Cass Avenue, Argonne, IL 60439

<sup>2</sup>Department of Physics, Northern Illinois University, DeKalb, IL 60115, USA

(Dated: February 5, 2019)

### EXPERIMENTAL DISPLACEMENT STATISTICS OF INERT PARTICLES

For experiments with inert particles we used glass 150  $\mu\text{m}$  diameter beads to match the size of the active rollers.

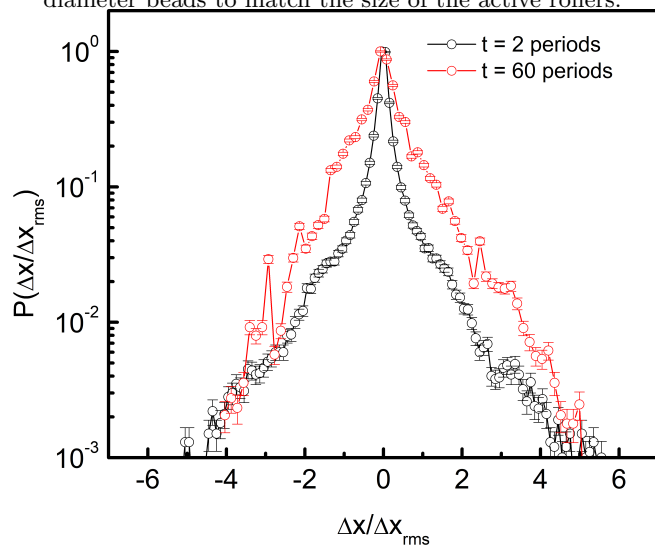

Fig. S1. Experimental inert particle displacement distributions for short ( $t = 2$  field periods) and intermediate times ( $t = 60$  field periods) obtained for the particle number density  $S_A = 0.4 \text{ mm}^{-2}$ .

The inert particles displacement statistics has a pronounced central peak in both, experiments (Fig. S 1) and simulation (main text Fig. 3e). It reaches a Gaussian distribution for times longer than 2 s.

### MOVIE CAPTION

Movie 1: An example of a magnetic roller gas realised for the particle number density  $S_A = 0.4 \text{ mm}^{-2}$ . The playback is in real time, scalebar is 5 mm.
